# Supplementary material for: Inhibition of HDAC6 Activity Protects Against Endothelial Dysfunction and Atherogenesis in vivo: A Role for HDAC6 Neddylation
Source: PubMed Central journal article supplement (PMC8245780; doi:10.3389/fphys.2021.675724), 2021-06-17

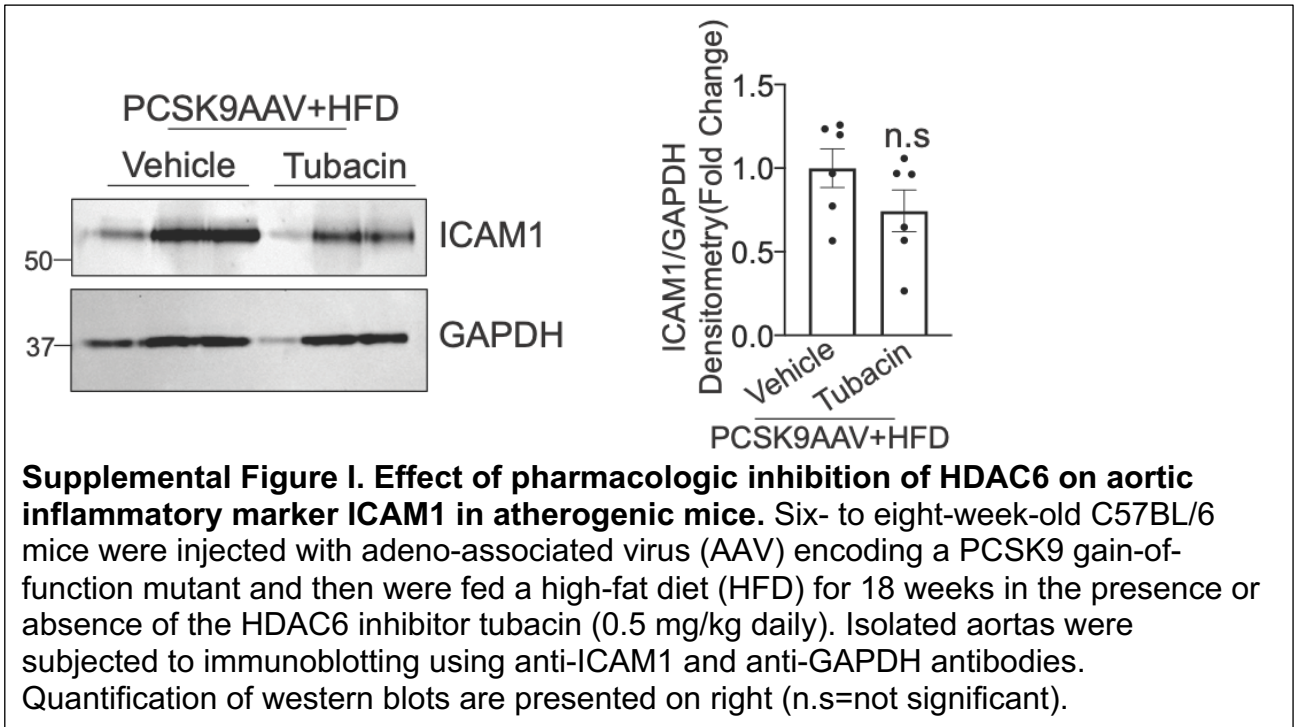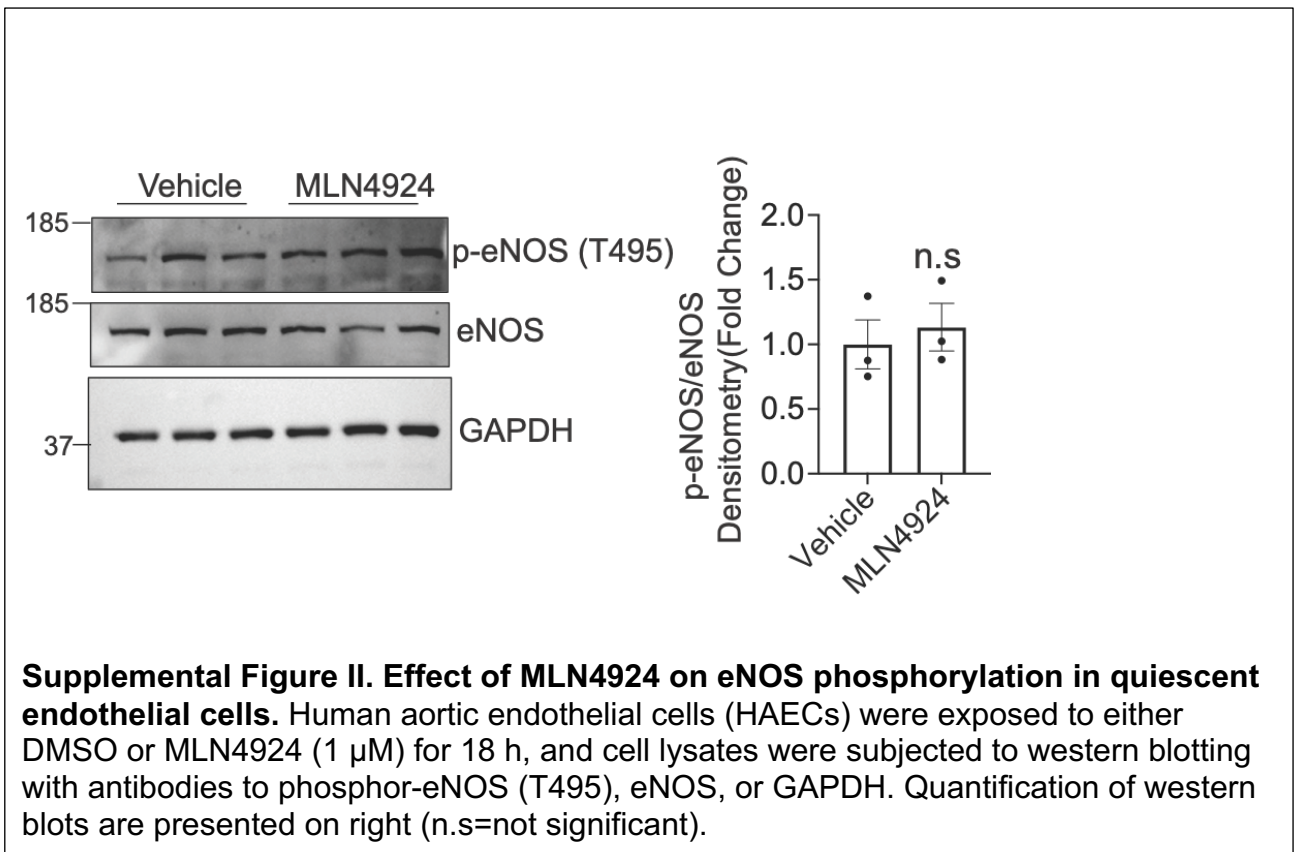

Supplement: Data_Sheet_1.pdf [file Data_Sheet_1.pdf]
